# Supplementary material for: Correlation between PPARG Pro12Ala Polymorphism and Therapeutic Responses to Thiazolidinediones in Patients with Type 2 Diabetes: A Meta-Analysis
Source: MDPI journal article supplement (doi:10.3390/pharmaceutics15061778), 2023-06-20
Supplement: s1 [file s1]

Supplementary materials

# Correlation between *PPARG* Pro12Ala polymorphism and therapeutic responses to thiazolidinediones in patients with type 2 diabetes: a meta-analysis

Eun Jeong Jang<sup>†</sup>, Da Hoon Lee<sup>†</sup>, Sae-Seul Im<sup>2</sup>, Jeong Yee<sup>1</sup> and Hye Sun Gwak<sup>1\*</sup>

Table S1. Search strategy.

| No  | Search term                                                                                                                                                                                                | Pubmed    | Web of Science | Embase    |
|-----|------------------------------------------------------------------------------------------------------------------------------------------------------------------------------------------------------------|-----------|----------------|-----------|
| #1  | thiazolidinedion* OR (thiazolidine dion*) OR TZD OR glitazon* OR pioglitazon* OR rosiglitazon* OR troglitazon* OR lobeglitazon*                                                                            | 18,638    | 23,748         | 48,392    |
| #2  | polymorph* OR variant* OR mutation* OR genotyp* OR haplotyp* OR allele* OR SNP* OR pharmacogen* OR Pro12Ala OR rs1801282                                                                                   | 1,799,285 | 1,847,836      | 2,359,231 |
| #3  | (peroxisome proliferator activated receptor gamma) OR (peroxisome proliferator activated receptor $\gamma$ ) OR (PPAR gamma) OR (PPAR $\gamma$ ) OR (PPAR $\gamma$ ) OR (PPAR $\gamma$ ) OR PPARG          | 32,887    | 39,501         | 55,511    |
| #4  | #1 and #2                                                                                                                                                                                                  | 3,513     | 4,159          | 7,221     |
| #5  | glycemic OR glycaemic OR glucos*                                                                                                                                                                           | 726,068   | 612,884        | 1,082,599 |
| #6  | lipid* OR cholesterol* OR lipoprotein*                                                                                                                                                                     | 953,031   | 782,880        | 1,268,672 |
| #7  | (glycated hemoglobin) OR (glycated haemoglobin) OR (glycosylated hemoglobin) OR (glycosylated haemoglobin) OR (hemoglobin A1c) OR (haemoglobin A1c) OR HbA1c OR A1c OR glycohemoglobin OR glycohaemoglobin | 77,204    | 56,209         | 161,732   |
| #8  | (fasting plasma glucos*) OR FPG OR (fasting blood glucos*) OR FBG OR (fasting blood sugar)                                                                                                                 | 75,291    | 63,067         | 110,732   |
| #9  | (low density lipoprotein cholesterol*) OR (LDL cholesterol*) OR (LDL C) OR (low density lipoprotein*) OR LDL OR (beta lipoprotein cholesterol*)                                                            | 143,810   | 129,409        | 263,387   |
| #10 | (high density lipoprotein cholesterol*) OR (HDL cholesterol*) OR (HDL C) OR (high density lipoprotein*) OR HDL OR (alpha lipoprotein cholesterol*)                                                         | 121,431   | 110,124        | 233,036   |
| #11 | triglycerid* OR triacylglycerol* OR TG                                                                                                                                                                     | 210,829   | 294,575        | 369,807   |
| #12 | (total cholesterol*) OR TC                                                                                                                                                                                 | 189,366   | 298,500        | 283,351   |
| #13 | #5 OR #6 OR #7 OR #8 OR #9 OR #10 OR #11 OR #12                                                                                                                                                            | 1,734,675 | 1,723,340      | 2,401,785 |
| #14 | #1 AND #4 AND #13                                                                                                                                                                                          | 201       | 293            | 509       |

**Table S2.** Begg's test and Egger's test.

| Outcomes          | P-values of Begg's test | P-values of Egger's test |
|-------------------|-------------------------|--------------------------|
| HbA <sub>1c</sub> | 0.85                    | 0.71                     |
| FPG               | 0.57                    | 0.74                     |
| TG                | 0.62                    | 0.90                     |
| HDL               | 1                       | 0.96                     |
| LDL               | 0.62                    | 0.51                     |
| TC                | 0.62                    | 0.19                     |

HbA<sub>1c</sub>: hemoglobin A<sub>1c</sub>, FPG: fasting plasma glucose, TG: triglycerides, LDL: low-density lipoprotein cholesterol, HDL: high-density lipoprotein cholesterol, TC: total cholesterol.

**Table S3.** Sensitivity analysis on the FPG outcome.

| Excluded study       | Heterogeneity I <sup>2</sup> (%) | Statistical model | Mean difference [95% CI] |
|----------------------|----------------------------------|-------------------|--------------------------|
| None                 | 59                               | Random            | -10.91 [-19.82, -2.01]   |
| Bluher et al. 2003   | 8                                | Fixed             | -14.37 [-20.67, -8.07]   |
| Hsieh et al. 2010    | 67                               | Random            | -11.79 [-22.49, -1.10]   |
| Kang et al. 2005     | 42                               | Fixed             | -7.07 [-12.63, -1.52]    |
| Namvaran et al. 2011 | 67                               | Random            | -11.17 [-20.70, -1.65]   |
| Pei et al. 2013      | 59                               | Random            | -9.20 [-19.32, 0.92]     |
| Priya et al. 2016    | 67                               | Random            | -11.40 [-23.33, 0.53]    |

CI: confidence interval; FPG: fasting plasma glucose.

**Table S4.** Sensitivity analysis on the TC outcome.

| Excluded study       | Heterogeneity I <sup>2</sup> (%) | Statistical model | Mean difference [95% CI] |
|----------------------|----------------------------------|-------------------|--------------------------|
| None                 | 0                                | Fixed             | 6.40 [-0.05, 12.84]      |
| Bluher et al. 2003   | 0                                | Fixed             | 5.48 [-1.51, 12.47]      |
| Hsieh et al. 2010    | 0                                | Fixed             | 4.91 [-2.04, 11.86]      |
| Kang et al. 2005     | 0                                | Fixed             | 12.43 [1.97, 22.88]      |
| Namvaran et al. 2011 | 0                                | Fixed             | 6.31 [-0.29, 12.91]      |
| Pei et al. 2013      | 0                                | Fixed             | 6.24 [-0.35, 12.82]      |

CI: confidence interval; TC: total cholesterol.

**Table S5.** Sensitivity analysis on the HbA<sub>1c</sub> outcome.

| Excluded study       | Heterogeneity I <sup>2</sup> (%) | Statistical model | Mean difference [95% CI] |
|----------------------|----------------------------------|-------------------|--------------------------|
| None                 | 7                                | Fixed             | -0.30 [-0.55, -0.05]     |
| Bluher et al. 2003   | 0                                | Fixed             | -0.39 [-0.66, -0.11]     |
| Hsieh et al. 2010    | 23                               | Fixed             | -0.34 [-0.65, -0.03]     |
| Kang et al. 2005     | 0                                | Fixed             | -0.23 [-0.50, 0.03]      |
| Namvaran et al. 2011 | 19                               | Fixed             | -0.31 [-0.57, -0.06]     |
| Pei et al. 2013      | 11                               | Fixed             | -0.26 [-0.52, 0.01]      |
| Priya et al. 2016    | 23                               | Fixed             | -0.40 [-0.92, 0.12]      |

CI: confidence interval; HbA<sub>1c</sub>: hemoglobin A<sub>1c</sub>.

**Table S6.** Sensitivity analysis on the TG outcome.

| Excluded study       | Heterogeneity I <sup>2</sup> (%) | Statistical model | Mean difference [95% CI] |
|----------------------|----------------------------------|-------------------|--------------------------|
| None                 | 6                                | Fixed             | -26.88 [-41.30, -12.46]  |
| Bluher et al. 2003   | 27                               | Fixed             | -30.08 [-51.44, -8.73]   |
| Hsieh et al. 2010    | 0                                | Fixed             | -30.28 [-45.44, -15.12]  |
| Kang et al. 2005     | 29                               | Fixed             | -27.30 [-42.18, -12.43]  |
| Namvaran et al. 2011 | 29                               | Fixed             | -26.25 [-41.82, -10.67]  |
| Pei et al. 2013      | 0                                | Fixed             | -21.69 [-37.39, -5.99]   |

CI: confidence interval; TG: triglyceride.

**Table S7.** Sensitivity analysis on the HDL outcome.

| <b>Excluded study</b> | <b>Heterogeneity I<sup>2</sup> (%)</b> | <b>Statistical model</b> | <b>Mean difference [95% CI]</b> |
|-----------------------|----------------------------------------|--------------------------|---------------------------------|
| None                  | 0                                      | Fixed                    | 0.31 [-1.62, 2.23]              |
| Bluher et al. 2003    | 0                                      | Fixed                    | 0.94 [-1.84, 3.73]              |
| Hsieh et al. 2010     | 0                                      | Fixed                    | -0.14 [-2.37, 2.09]             |
| Kang et al. 2005      | 0                                      | Fixed                    | 0.18 [-1.88, 2.24]              |
| Namvaran et al. 2011  | 0                                      | Fixed                    | 0.46 [-1.55, 2.46]              |
| Pei et al. 2013       | 0                                      | Fixed                    | 0.31 [-1.62, 2.25]              |

CI: confidence interval; HDL: high-density lipoprotein cholesterol.

**Table S8.** Sensitivity analysis on the LDL outcome.

| <b>Excluded study</b> | <b>Heterogeneity I<sup>2</sup> (%)</b> | <b>Statistical model</b> | <b>Mean difference [95% CI]</b> |
|-----------------------|----------------------------------------|--------------------------|---------------------------------|
| None                  | 0                                      | Fixed                    | 6.69 [-0.90 14.29]              |
| Bluher et al. 2003    | 0                                      | Fixed                    | 6.60 [-1.82, 15.04]             |
| Hsieh et al. 2010     | 0                                      | Fixed                    | 6.48 [-2.05, 15.02]             |
| Kang et al. 2005      | 0                                      | Fixed                    | 6.94 [-2.34, 16.22]             |
| Namvaran et al. 2011  | 0                                      | Fixed                    | 6.82 [-1.69, 15.32]             |
| Pei et al. 2013       | 0                                      | Fixed                    | 6.68 [-1.18, 14.54]             |

CI: confidence interval; LDL: low-density lipoprotein cholesterol.
